# Supplementary material
Source: Research Square preprint supplement (doi:10.21203/rs.3.rs-5505014/v2)
Supplement: Supplementary file 1 [file 036735a3abecdcf4ef7eacbb.docx]

| **Characteristic** | **Exposed N = 40,053***1* | **Nonexposed N = 40,053***1* | **SMD** |
| --- | --- | --- | --- |
| **Age** (at index date) | 74.42 (7.08) | 74.42 (7.12) | 0.001 |
| **Sex** |  |  |  |
| Female | 24,754 (62%) | 24,771 (62%) | 0.009 |
| Male | 15,299 (38%) | 15,282 (38%) | - 0.009 |
| **Race** |  |  |  |
| American Indian or Alaska Native | 98 (0.2%) | 55 (0.1%) | 0.02 |
| Asian | 783 (2.0%) | 773 (1.9%) | 0.002 |
| Black or African American | 1,120 (2.8%) | 1,127 (2.8%) | - 0.001 |
| Native Hawaiian and Other Pacific Islander | 30 (<0.1%) | 14 (<0.1%) | 0.01 |
| Other | 379 (0.9%) | 359 (0.9%) | 0.005 |
| White | 37,643 (94%) | 37,725 (94%) | -0.009 |
| **Ethnicity** |  |  |  |
| Hispanic or Latino | 1,971 (4.9%) | 1,923 (4.8%) | 0.005 |
| Not Hispanic or Latino | 38,082 (95%) | 38,130 (95%) | -0.005 |
| **Smoking status** |  |  |  |
| Active | 3,499 (8.7%) | 3,444 (8.6%) | 0.005 |
| Former | 9,930 (25%) | 9,907 (25%) | 0.001 |
| Never | 26,624 (66%) | 26,702 (67%) | -0.004 |
| **Insurance status** |  |  |  |
| Commercial | 9,892 (25%) | 10,603 (26%) | -0.009 |
| Governmental | 446 (1.1%) | 524 (1.3%) | 0.01 |
| Medicare | 16,659 (42%) | 17,322 (43%) | -0.004 |
| Military | 402 (1.0%) | 418 (1.0%) | 0.02 |
| Multiple insurances listed | 12,578 (31%) | 11,118 (28%) | 0.005 |
| No insurance | 76 (0.2%) | 68 (0.2%) | 0.02 |
| **Region** |  |  |  |
| American Territory | 8 (<0.1%) | 15 (<0.1%) | 0.002 |
| North Central | 10,243 (26%) | 9,315 (23%) | 0.004 |
| Northeast | 5,996 (15%) | 7,306 (18%) | -0.006 |
| South | 15,657 (39%) | 15,249 (38%) | 0.003 |
| West | 8,149 (20%) | 8,168 (20%) | 0.005 |
| **Baseline BCVA (logMAR)** | 0.20 (0.23) | 0.17 (0.29) | 0.09 |
| **AMD Stage** |  |  |  |
| Early | 30,626 (76%) | 30,643 (77%) | - 0.001 |
| Intermediate | 9,427 (24%) | 9,410 (23%) | 0.001 |
| Follow-up duration (days) | 1,239 (656) | 1,102 (623) | 0.21 |
| *1* Mean (SD); n (%) | | | |

Table 1: Descriptives of the total cohort of eligible eyes stratified by exposure (cataract surgery) at the index date

Abbreviations: AMD: age-related macular degeneration, BCVA: best corrected visual acuity, SD: standard deviation, SMD: standardized mean difference
